# Supplementary material for: Pancracine, a Montanine-Type Amaryllidaceae Alkaloid, Inhibits Proliferation of A549 Lung Adenocarcinoma Cells and Induces Apoptotic Cell Death in MOLT-4 Leukemic Cells
Source: MDPI journal article supplement (doi:10.3390/ijms22137014), 2021-06-29
Supplement: s1 [file s1]

## Supplementary Material for:

### **Pancracine, a montanine-type Amaryllidaceae alkaloid, inhibits cell growth via Akt/p27/pRb pathway and induces p53-mediated apoptosis of cancer cells**

Darja Koutova<sup>a</sup>, Radim Havelek<sup>a\*</sup>, Eva Peterova<sup>a</sup>, Darina Muthna<sup>a</sup>, Karel Kralovec<sup>b</sup>, Katerina Breiterova<sup>c</sup>, Lucie Cahlikova<sup>c</sup>, Martina Rezacova<sup>a</sup>

<sup>a</sup>Department of Medical Biochemistry, Faculty of Medicine in Hradec Kralove, Charles University, Simkova 870, Hradec Kralove 500 03, Czech Republic

<sup>b</sup>Department of Biological and Biochemical Sciences, Faculty of Chemical Technology, University of Pardubice, Studentska 573, Pardubice 532 10, Czech Republic

<sup>c</sup>ADINACO Research Group, Department of Pharmaceutical Botany, Faculty of Pharmacy, Charles University, Heyrovskeho 1203, Hradec Kralove 500 05, Czech Republic

\*Corresponding author

Radim Havelek, Ph.D.

Department of Medical Biochemistry,  
Faculty of Medicine in Hradec Kralove,  
Charles University,

Simkova 870,  
500 03 Hradec Kralove,

Tel.: +420495816293,

E-mail address: havelekr@lfhk.cuni.cz

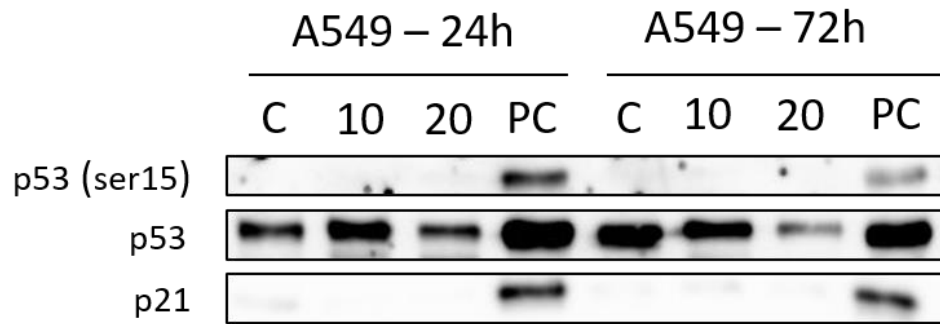

**Figure S1.** Western blot analysis of p53 phosphorylated at serine 15, p53 and p21 in non-small cell lung adenocarcinoma A549 cells upon treatment with either 10  $\mu$ M or 20  $\mu$ M pancracine for 24 and 72 hours. Control cells were mock treated with 0.1% DMSO, indicated as C, and 0.25  $\mu$ M doxorubicin treated cells were used as a positive control, indicated as PC. These experiments were performed at least three times with similar results and a cropped blot is shown from one representative experiment.

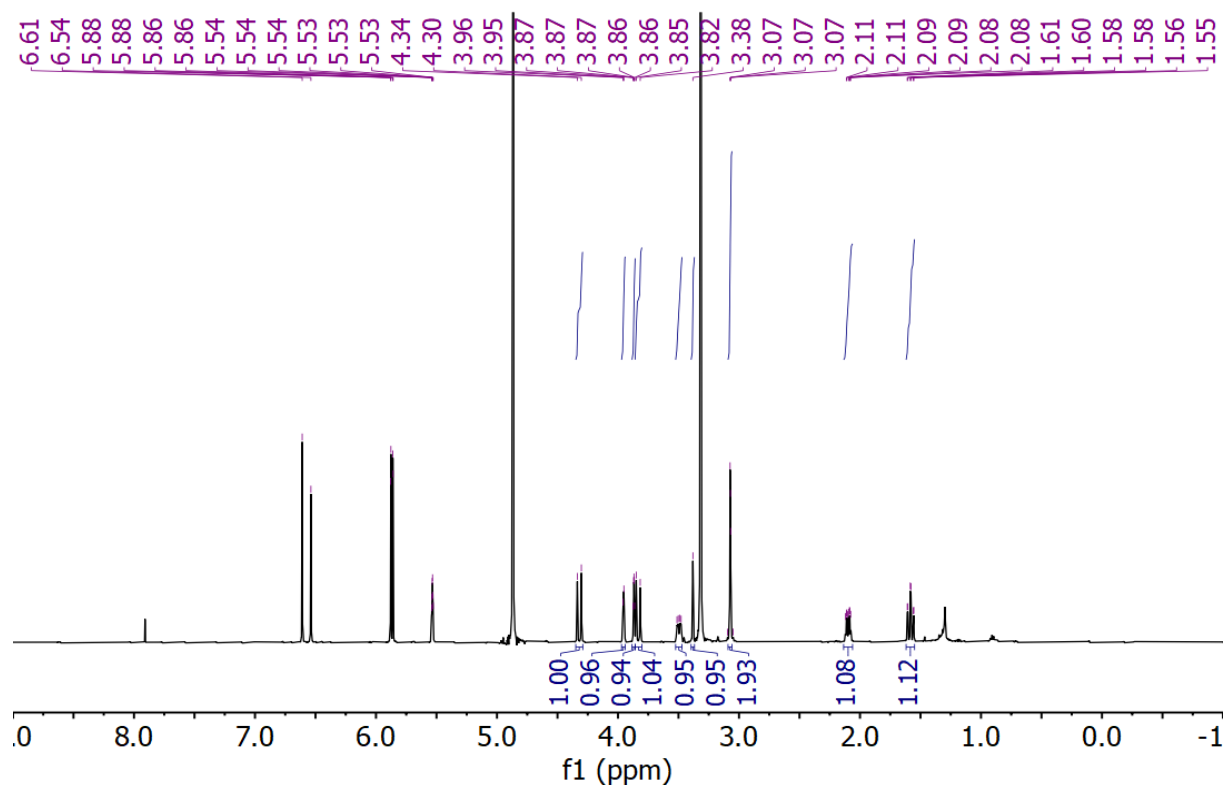

**Figure S2.**  $^1\text{H}$ -NMR analysis of pancracine

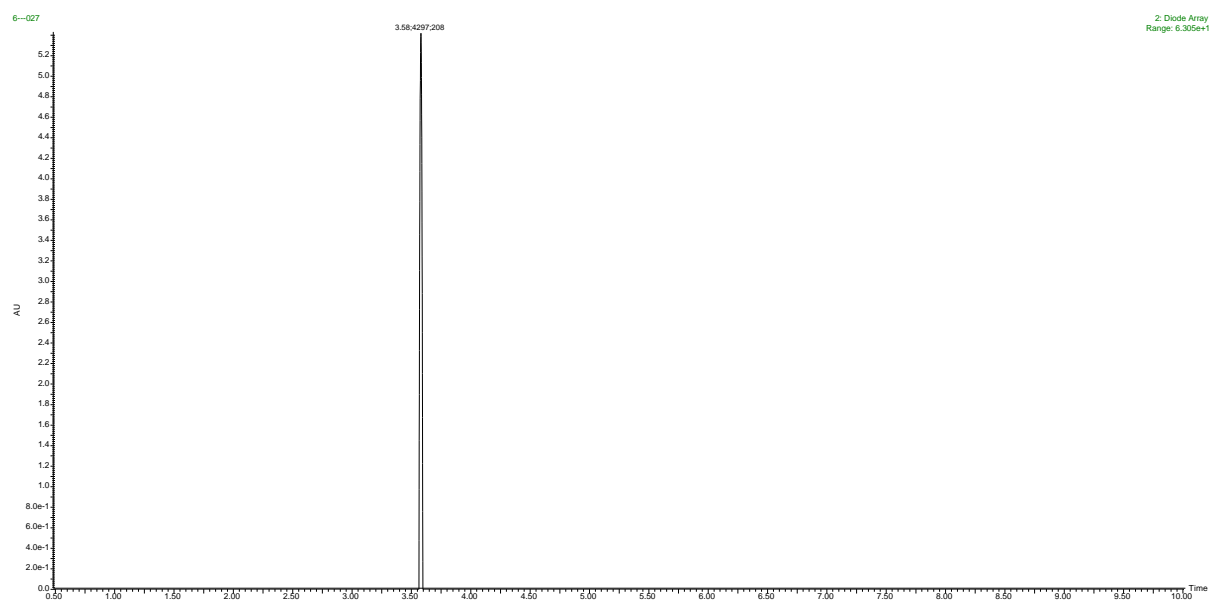

**Figure S3.** HPLC/UV analysis of pancracine

|             |             |                        |                |                 |                        |
|-------------|-------------|------------------------|----------------|-----------------|------------------------|
| Sample Name | NPE 25 F51B | Position               | 13             | Instrument Name | GCMS                   |
| User Name   | Lucka       | Inj Vol                | 0              | InjPosition     |                        |
| Sample Type | Sample      | IRM Calibration Status | Not Applicable | Data Filename   | 3220LC.D               |
| ACQ Method  | LUCKA_7.M   | Comment                |                | Acquired Time   | 11/11/2016 10:11:46 AM |

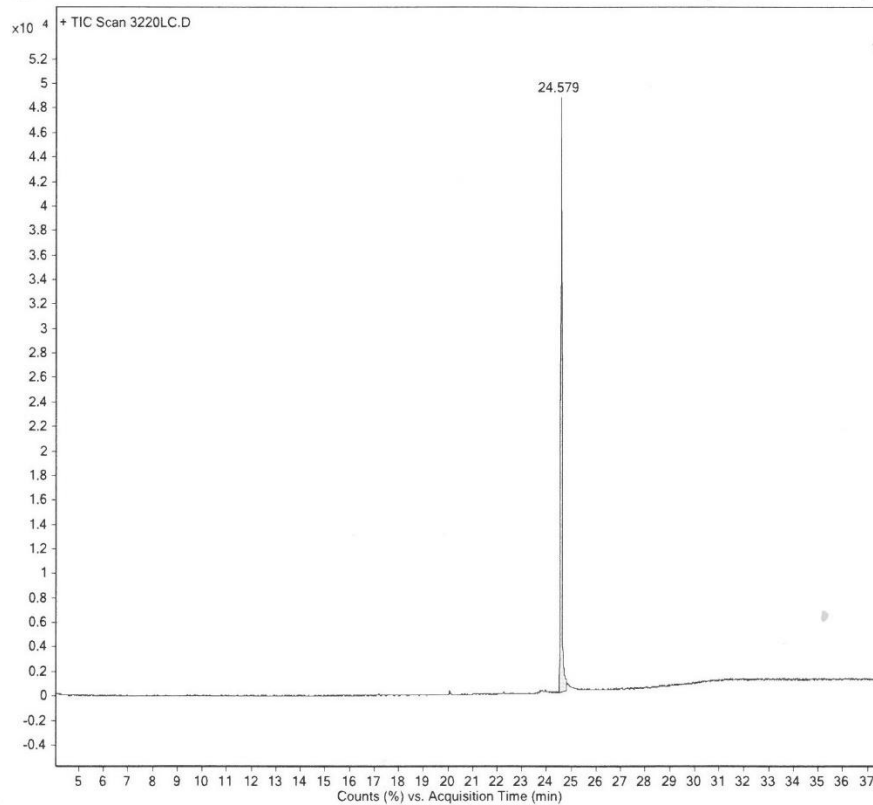

**Fig. S4.** GC/MS chromatogram of pancracine
